# Supplementary material for: Self-eating and self-killing: crosstalk between autophagy and apoptosis
Source: Springer Nature journal article supplement (doi:10.1038/nrm2239), 2007-08-23
Supplement: 41580_2007_BFnrm2239_MOESM1_ESM.pdf [file 41580_2007_BFnrm2239_MOESM1_ESM.pdf]

**Supplementary information S1 (table) | Examples of cell death exacerbated by inhibition of autophagy**

| <b>Cell type</b>                                                            | <b>Cytotoxic condition</b>                            | <b>Autophagy inhibitor</b>                                                           | <b>References</b> |
|-----------------------------------------------------------------------------|-------------------------------------------------------|--------------------------------------------------------------------------------------|-------------------|
| HeLa cervical carcinoma                                                     | Culture in serum- and nutrient-free medium            | Knockdown of <i>ATG5</i> , <i>ATG10</i> , <i>ATG12</i> , <i>BECN1</i> , <i>LAMP2</i> | 1<br>2            |
| <i>Bax</i> <sup>-/-</sup> <i>Bak</i> <sup>-/-</sup> bone marrow cells       | Withdrawal of IL3                                     | Knockdown of <i>Atg5</i> , <i>Atg7</i>                                               | 3                 |
| <i>Bax</i> <sup>-/-</sup> <i>Bak</i> <sup>-/-</sup> kidney epithelial cells | Hypoxia                                               | Constitutively active AKT or knockdown of <i>Becn1</i>                               | 4                 |
| HeLa transfected with BCL2 or BCL-XL                                        | Hypoxia                                               | Knockdown of <i>BECN1</i>                                                            | 4                 |
| HeLa cervical carcinoma                                                     | ABT737 (BH3 mimetic)                                  | Knockdown of <i>BECN1</i>                                                            | 5                 |
| L1210 murine leukemia                                                       | HA14-1 (BH3 mimetic)                                  | Wortmannin                                                                           | 6                 |
| MCF7 breast cancer                                                          | Camptothecin (topoisomerase-1 inhibitor)              | Knockdown of <i>ATG7</i> , <i>BECN1</i>                                              | 7                 |
| Chronic myeloid leukaemia                                                   | SAHA (HDAC inhibitor)                                 | Chloroquine                                                                          | 8                 |
| c-Myc-induced lymphomas                                                     | Reactivation of a latent p53 transgene <i>in vivo</i> | Chloroquine                                                                          | 9                 |
| HCT116 colon cancer                                                         | 6-thioguanine                                         | Knockdown of <i>ATG5</i>                                                             | 10                |

-----  
*Atg*, autophagy gene; HDAC, histone deacetylase; IL3, interleukin-3; LAMP2, lysosomal-associated membrane protein-2; SAHA, suberoylanilide hydroxamic acid.

## References

1. Boya, P. *et al.* Inhibition of macroautophagy triggers apoptosis. *Mol. Cell. Biol.* **25**, 1025–1040 (2005).
2. Gonzalez-Polo, R.A. *et al.* The apoptosis/autophagy paradox: autophagic vacuolization before apoptotic death. *J. Cell Sci.* **118**, 3091–3102 (2005).
3. Lum, J.J. *et al.* Growth factor regulation of autophagy and cell survival in the absence of apoptosis. *Cell* **120**, 237–248 (2005).
4. Degenhardt, K. *et al.* Autophagy promotes tumor cell survival and restricts necrosis, inflammation, and tumorigenesis. *Cancer Cell* **10**, 51–64 (2006).
5. Maiuri, M.C. *et al.* Functional and physical interaction between Bcl-XL and a BH3-like domain in Beclin-1. *EMBO J.* **26**, 2527–2539 (2007).
6. Kessel, D. & Reiners, J.J., Jr. Initiation of apoptosis and autophagy by the Bcl-2 antagonist HA14-1. *Cancer Lett.* **249**, 294–299 (2007).
7. Abedin, M.J., Wang, D., McDonnell, M.A., Lehmann, U. & Kelekar, A. Autophagy delays apoptotic death in breast cancer cells following DNA damage. *Cell Death Differ.* **14**, 500–510 (2007).
8. Carew, J.S. *et al.* Targeting autophagy augments the anticancer activity of the histone deacetylase inhibitor SAHA to overcome Bcr-Abl-mediated drug resistance. *Blood* **110**, 313–322 (2007).
9. Amaravadi, R.K. *et al.* Autophagy inhibition enhances therapy-induced apoptosis in a Myc-induced model of lymphoma. *J. Clin. Invest.* **117**, 326–336 (2007).  
**This study reports a novel therapeutic strategy for inhibiting autophagy using the widely employed antimalaria drug chloroquine. Chloroquine can be used *in vivo* to ameliorate the therapeutic (pro-apoptotic) effect of p53 induction.**
10. Zeng, X., Yan, T., Schupp, J.E., Seo, Y. & Kinsella, T.J. DNA mismatch repair initiates 6-thioguanine-induced autophagy through p53 activation in human tumor cells. *Clin. Cancer Res.* **13**, 1315–1321 (2007).
